# Supplementary material for: Resveratrol Ameliorates Imiquimod-Induced Psoriasis-Like Skin Inflammation in Mice
Source: PubMed Central journal article supplement (PMC4428792; doi:10.1371/journal.pone.0126599), 2015-05-12

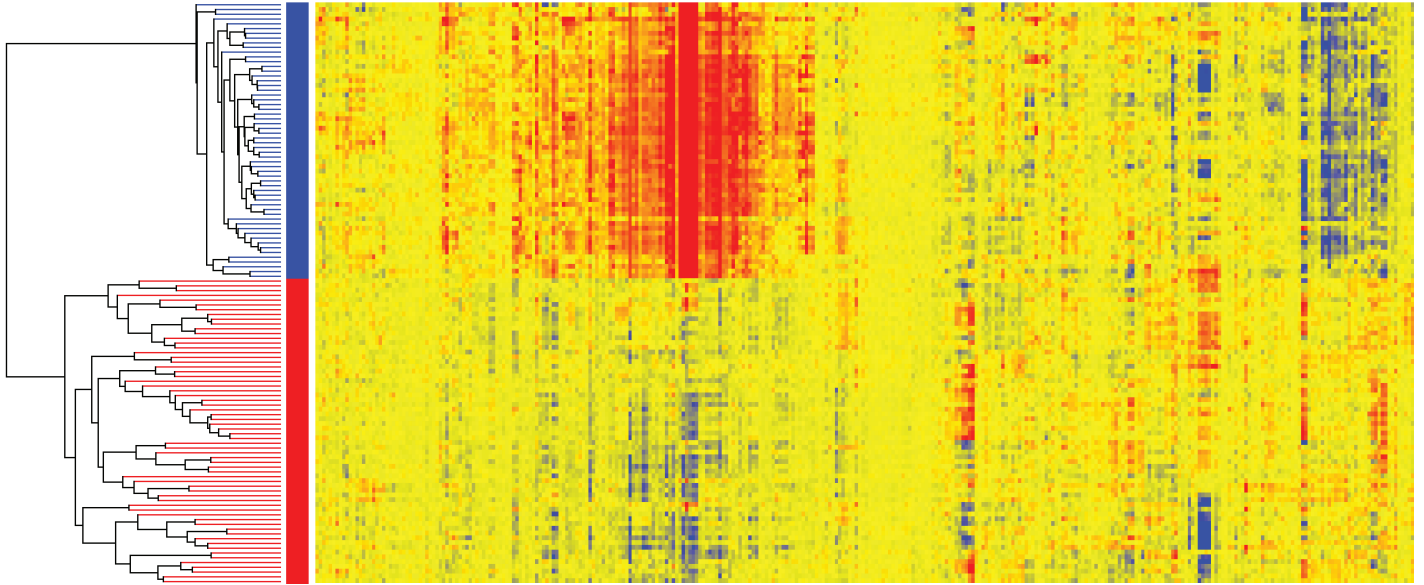

- Normal healthy controls
- Psoriatic patients

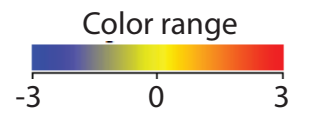

Supplement: pone.0126599.s001.pdf [file pone.0126599.s001.pdf]
