# Supplementary material for: Resveratrol Ameliorates Imiquimod-Induced Psoriasis-Like Skin Inflammation in Mice
Source: PubMed Central journal article supplement (PMC4428792; doi:10.1371/journal.pone.0126599), 2015-05-12
Supplement: pone.0126599.s002.pdf [file pone.0126599.s002.pdf]

**S1 Table: Primer sequences for PCR**

| <b>Gene (M. musculus)</b> | <b>Forward primer</b>     | <b>Reverse primer</b>    |
|---------------------------|---------------------------|--------------------------|
| M. Alox8                  | AGGTGTCACCCTCTCTTCAAGC    | GCAAGCGTGTTGATGTGCAGTG   |
| M. Chi3l1                 | ATTACCAGGCCGGTTCACCAAG    | CCTTTGAGGAAGTCGCATATCTCG |
| M. CXCL3                  | TGGTCAAGAAGTTTGCCTCAACCC  | TGGACTTGCCGCTCTTCAGTATC  |
| M. Defb14                 | CAGCTTGTGGGAAGCAGTCAAC    | AGCAGGCACCAAGAACAAGATGAG |
| M. Ear5                   | TGCCAGCACTTTGTACCTTCCC    | AAGCCATATGCAGCGCAGACAG   |
| M. Epgn                   | GCAGTCTGCCTCTTGTCAAAGC    | AGGGATCACCTCTGCTTCTTCG   |
| M. Fam125a                | AGAAAGCCGGCTACTTCCTGTG    | ACCACATTGTCCTGAGGGTTCTC  |
| M. Hbegf                  | TGGTGGCTGTAGTACTGTCGTC    | CCTCCTCTCCTGTGGTACCTAAAC |
| M. Il-17a                 | TGAGTCCAGGGAGAGCTTCA      | TTGGACACGCTGAGCTTTGAGG   |
| M. Il-19                  | GGAGAACCTCAGGAGCATTAAAGCC | AGAATGTCAGCAGGTTGTTGGTC  |
| M. Il-33                  | CTGCCTCCCTGAGTACATACAATG  | AGCGTAGTAGCACCTGGTCTTG   |
| M. Lce1l                  | GTCCTCAGCGTTACCAGTTTCAGG  | TGGCAGGACATTCTTGGGAGGAAG |
| M. Lce3e                  | GCCCTGCTGACTTCTTCTATCCAG  | AGCTACCAGGGAATGAGGACTGTG |
| M. Lcn2                   | TTCCTCTGGGAAATATGCACAGG   | GGCCACTTGCACATTGTAGCTC   |
| M. Pck1                   | GCTGGATGTCGGAAGAGGACTTTG  | GACATACATGGTGCGGCCTTTC   |
| M. Ppp1r3c                | ATGAGCTGCACCAGAATGATCC    | GGCATGACGGAACTTGTCAAAGG  |
| M. Psors1c2               | AGCCATGATGCTCACCTGGAAG    | TTGCCTGAAATGCCTCCTGCAC   |
| M. PTGS2=COX2             | TGGTGAAACTCTGGACAGACAAC   | ATACACCTCTCCACCAATGACCTG |
| M. Serpinb3a              | AGTATGATTGTCCTGTTGCCAGTG  | AGCAGTGAGTTGTTCTTCAAGCTG |
| M. Sprr2b                 | GCAATTTCCACCATGCCAGCAG    | GGATGGAAGTGTGCTATGGAGTC  |
| M. St6galnac5             | CACAGGATGCTGCAGTTCGATG    | CCAAGTGTGGAGATCTTCCCTGTC |
| M. Tmprss11g              | GCGGGTACTTTGAAACGGCAAG    | TGCTTGTGCTGCGTTCATTTCTC  |
| M. Trim63                 | GGCCATTGACTTTGGGACAGATG   | AGAGCGTGTCTCACTCATCTCC   |
| M. Il-23                  | ACTCAAGGACAACAGCCAGTTC    | GAAGATGTCAGAGTCAAGCAGGTG |
| M. TNFa                   | TTCCCAAATGGCCTCCCTCTCATC  | TCCTCCACTTGGTGGTTTGCTAC  |
|                           |                           |                          |
| M. Myo18b <sup>a</sup>    | GCACAAAGACCTCATTGCACAGTC  | TGCAGCTGTAGCTCCTGAATCTG  |

Primers used for qPCR results and validation of microarray.

<sup>a</sup>Reference Gene
