# Supplementary material for: Resveratrol Ameliorates Imiquimod-Induced Psoriasis-Like Skin Inflammation in Mice
Source: PubMed Central journal article supplement (PMC4428792; doi:10.1371/journal.pone.0126599), 2015-05-12
Supplement: pone.0126599.s003.pdf [file pone.0126599.s003.pdf]

**S2 Table: RNA microarray and qPCR correlation analysis.**

| Gene     | Control  | IMQ Group   | qPCR ratio  | Control<br>(unlogged) | IMQ Group<br>(unlogged) | Array<br>ratio |
|----------|----------|-------------|-------------|-----------------------|-------------------------|----------------|
| Alox8    | 0.03108  | 2.26111     | 72.751287   | 197.0999              | 2074.933666             | 10.52732       |
| Chi3l1   | 0.0352   | 13.9946     | 397.5738636 | 382.4842              | 8264.131526             | 21.60646       |
| CXCL3    | 0.016551 | 0.155788889 | 9.412413449 | 113.8574              | 119.1907527             | 1.046843       |
| Defb14   | 0.21045  | 4.7067      | 22.36493229 | 229.5944              | 1759.570983             | 7.663825       |
| ear5     | 0.2465   | 17.2321     | 69.90709939 | 236.9351              | 6450.787154             | 27.22596       |
| Epgn     | 0.203063 | 2.1441      | 10.5588181  | 644.5633              | 1981.286777             | 3.073843       |
| Fam125a  | 0.166125 | 1.21167     | 7.293724605 | 392.0928              | 360.7648573             | 0.920101       |
| Hbegf    | 0.140525 | 3.6926      | 26.27717488 | 409.8124              | 1889.088401             | 4.609641       |
| IL17     | 0.011501 | 0.11368     | 9.884143028 | 137.5364              | 161.2878777             | 1.172693       |
| IL19     | 0.001685 | 0.65869     | 390.9139466 | 111.7653              | 539.7587816             | 4.829395       |
| IL33     | 0.220488 | 2.3375      | 10.60150802 | 1026.205              | 2246.766528             | 2.189394       |
| Lce1l    | 14.64963 | 38.645      | 2.637951483 | 1344.242              | 757.1922056             | 0.563286       |
| Lce3e    | 0.0291   | 10.2981     | 353.8865979 | 74.15264              | 3165.620286             | 42.69059       |
| Lcn2     | 0.114625 | 7.699       | 67.16684842 | 389.9534              | 3403.311524             | 8.727482       |
| Pck1     | 0.138825 | 0.40761     | 2.936142626 | 420.6309              | 483.5043302             | 1.149474       |
| Ppr1r3c  | 3.72175  | 4.1807      | 1.123315645 | 3440.863              | 1252.677216             | 0.364059       |
| Psors1c2 | 1.15E-02 | 0.07735     | 6.72535594  | 142.4503              | 743.5232264             | 5.219528       |

|                        |             |         |             |          |             |          |
|------------------------|-------------|---------|-------------|----------|-------------|----------|
| PTGS2                  | 0.079513    | 0.39032 | 4.908913693 | 636.7291 | 947.7419584 | 1.488454 |
| Serpina3a              | 0.104325    | 14.0302 | 134.485502  | 25.65687 | 1583.074297 | 61.70176 |
| Spr2b                  | 0.445425    | 304.83  | 684.357636  | 119.408  | 7122.899897 | 59.65178 |
| st6galnac5             | 0.041113    | 0.05758 | 1.400547279 | 287.3808 | 214.670509  | 0.74699  |
| Tmorss11g              | 0.099988    | 3.4568  | 34.57232154 | 251.7448 | 1554.617019 | 6.175368 |
| Trim63                 | 0.540088    | 0.62616 | 1.159367695 | 1061.829 | 538.5190237 | 0.507162 |
|                        |             |         |             |          |             |          |
| Pearson<br>Correlation |             |         |             |          |             |          |
| R value                | 0.699679327 |         |             |          |             |          |

Table is showing genes chosen for correlation analysis between the array ratio and the qPCR ratio. Raw data and ratios are provided. Ratios were used for Pearson Correlation calculation.
